# Supplementary material for: Faciliter l’accès aux données administratives sur la vaccination anti-SRAS-CoV-2 aux fins de la recherche
Source: PubMed Central journal article supplement — CMAJ. 2022 Aug 29;194(33):E1147–52. [Article in French] doi: 10.1503/cmaj.211712-f (PMC9435537; doi:10.1503/cmaj.211712-f), 2022-08-29
Supplement: 211712-ana-1-at.pdf [file 211712-ana-1-at.pdf]

## Supplementary Table: Contributors to the Canadian COVID-19 Emergency Department Rapid Response Network

### 1. Purpose

This supplementary table provides details of the support staff at each of the participating institutions in the Canadian COVID-19 Emergency Department Rapid Response Network. This supplementary document should be attached to each peer-reviewed manuscript after the methods manuscript (M1). The purpose is to ensure research staffs and lead coordinators are appropriately recognized for their contributions to the network.

### 2. List of Support Staff

Table 1. Network coordinating center staff at the University of British Columbia

| Name         | Roles                | Contributions                                                                                       |
|--------------|----------------------|-----------------------------------------------------------------------------------------------------|
| Jeffrey Hau  | Data manager         | REDCap, data processing and analysis for manuscripts.                                               |
| Vi Ho        | National coordinator | Coordinate with provincial coordinators and training/onboarding of research assistants.             |
| Serena Small | Research coordinator | Ethics & privacy reviews, data management plan, privacy impact assessment, and qualitative analyses |
| Amber Cragg  | Research manager     | Data and manuscript management                                                                      |
| Vicky Xu     | Data analyst         | Data processing and analysis for manuscripts.                                                       |

Table 2. Provincial Coordinators

| Name              | Province | Institutional affiliation                                                                                | Contributions to CCEDRRN                                                                         |
|-------------------|----------|----------------------------------------------------------------------------------------------------------|--------------------------------------------------------------------------------------------------|
| Corinne DeMone    | NS       | Dalhousie University, Halifax, Nova Scotia                                                               | Research ethics board submission, manages research assistants, data cleaning and quality.        |
| Jacqueline Fraser | NB       | Dalhousie University, St. John New Brunswick                                                             | Site coordinator as well as research assistant.                                                  |
| Martyne Audet     | QC       | Centre intégré de santé et de services sociaux de Chaudière-Appalaches (Hôtel-Dieu de Lévis site), Lévis | Provincial research coordinator, translation of research material to French, ethics management.  |
| Connie Taylor     | ON       | Queen's University, Kingston                                                                             | Coordination of research assistants in Ontario, maintenance of REB applications for the province |
| Kate Mackenzie    | MB       | Health Sciences Centre, Winnipeg                                                                         | Lead RA for the province                                                                         |

|              |    |                                           |                                                                                           |
|--------------|----|-------------------------------------------|-------------------------------------------------------------------------------------------|
| Aimee Goss   | SK | University of Saskatchewan, Saskatoon     | Screens records in Saskatoon, data/extraction and entry, coordinates research assistants. |
| Stacey Lobos | AB | University of Calgary, Calgary            | Provincial coordinator lead for Alberta, oversight of all Alberta sites.                  |
| Josie Kanu   | BC | University of British Columbia, Vancouver | Provincial coordinator lead for BC, oversight of all BC sites.                            |

Table 3. Institutional research assistant (RA) leads

Institutional RA leads are responsible for data extraction and integrity, communication with provincial leads.

| Name                 | Province | Institutional affiliation(s)                                                                                                                                                             |
|----------------------|----------|------------------------------------------------------------------------------------------------------------------------------------------------------------------------------------------|
| Corinne DeMone       | NS       | Dartmouth General Hospital, Cobequid Community Health Centre, Hants Community Hospital<br>Secondary Assessment Centers of the Dartmouth General Hospital, and Halifax Infirmary, Halifax |
| Jacqueline Fraser    | NB       | Saint John Regional Hospital, Saint John                                                                                                                                                 |
| Alexandra Nadeau     | QC       | CHU de Québec Université Laval, Quebec City                                                                                                                                              |
| Audrey Nolet         | QC       | Centre intégré de santé et de services sociaux de Chaudière-Appalaches (Hôtel-Dieu de Lévis site), Lévis                                                                                 |
| Xiaoqing Xue         | QC       | Jewish General Hospital, Montréal                                                                                                                                                        |
| David Iannuzzi       | QC       | McGill University Health Center, Montréal                                                                                                                                                |
| Chantal Lanthier     | QC       | Hôpital du Sacré-Cœur de Montréal, Montréal                                                                                                                                              |
| Konika Nirmalanathan | ON       | University Health Network, Toronto                                                                                                                                                       |
| Vlad Latiu           | ON       | Kingston General Hospital, Hotel Dieu Hospital, Kingston                                                                                                                                 |
| Joanna Yeung         | ON       | Sunnybrook Health Sciences Center, Toronto                                                                                                                                               |
| Natasha Clayton      | ON       | Hamilton General Hospital, Juravinski Hospital, Hamilton                                                                                                                                 |
| Tom Chen             | ON       | London Health Sciences Centre, London                                                                                                                                                    |
| Jenna Nichols        | ON       | Health Sciences North, Sudbury                                                                                                                                                           |
| Kate Mackenzie       | MB       | Health Sciences Centre, Winnipeg                                                                                                                                                         |
| Aimee Goss           | SK       | St. Paul's Hospital, Royal University Hospital, Saskatoon City Hospital, Saskatoon                                                                                                       |
| Stacy Ruddell        | AB       | Foothills Medical Centre, Peter Lougheed Centre, Rockyview General Hospital, South Health Campus, Calgary                                                                                |
| Natalie Runham       | AB       | University of Alberta Hospital, Edmonton                                                                                                                                                 |
| Karlin Su            | AB       | Royal Alexandra Hospital/Northeast Community Health Center, Edmonton                                                                                                                     |
| Taylor Bootsma       | BC       | St. Paul's Hospital, Mount Saint Joseph, Vancouver                                                                                                                                       |
| Bernice Huynh        | BC       | Abbotsford Regional Hospital and Cancer Center, Abbotsford                                                                                                                               |
| Amanda Swirhun       | BC       | Royal Columbian Hospital, New Westminster                                                                                                                                                |
| Tracy Taylor         | BC       | Eagle Ridge Hospital and Health Care Centre, Port Moody                                                                                                                                  |
| Mai Hayashi          | BC       | Royal Inland Hospital, Kamloops                                                                                                                                                          |

| Name             | Province | Institutional affiliation(s)          |
|------------------|----------|---------------------------------------|
| Mackenzie Cheyne | BC       | Kelowna General Hospital, Kelowna     |
| Neenah Williams  | BC       | Surrey Memorial Hospital, Surrey      |
| Katherine Lam    | BC       | Vancouver General Hospital, Vancouver |
| Kelsey Compagna  | BC       | Lions Gate Hospital, Vancouver        |

Table 4. Contributing Study Sites and Investigators

| Lead Investigator               | Contributing Site / Code                                                      | Member Investigators |
|---------------------------------|-------------------------------------------------------------------------------|----------------------|
| <b>Maritime</b>                 |                                                                               |                      |
| Patrick Fok                     |                                                                               |                      |
| <b>Nova Scotia</b>              |                                                                               |                      |
| Hana Wiemer                     | Halifax Infirmary/ 902                                                        | Patrick Fok          |
|                                 | Dartmouth General Hospital/ 903                                               | Hana Wiemer          |
|                                 | Hants Community Hospital/ 904                                                 | Samuel Campbell      |
|                                 | Cobequid Community Health Centre/ 905                                         | Kory Arsenault       |
|                                 | Secondary Assessment Centers of Dartmouth General and Halifax Infirmary/ 908  | Tara Dahn            |
| <b>New Brunswick</b>            |                                                                               |                      |
| Kavish Chandra                  | Saint John Regional Hospital/ 901                                             | Kavish Chandra       |
| <b>Quebec</b>                   |                                                                               |                      |
| Patrick Archambault             | Hotel-Dieu de Lévis/ 701                                                      | Patrick Archambault  |
|                                 | Jewish General Hospital/ 702                                                  | Joel Turner          |
|                                 | Centre Hospitalier de l'Université Laval (CHU de Québec)/ 703                 | Éric Mercier         |
|                                 | L'hôpital Royal Victoria - Royal Victoria Hospital/ 705                       | Greg Clark           |
|                                 | Hôpital de l'Enfant-Jésus, CHU de Québec/ 706                                 | Éric Mercier         |
|                                 | Hôpital du Saint-Sacrement, CHU de Québec/ 707                                | Éric Mercier         |
|                                 | Hôpital Saint-François d'Assise, CHU de Québec/ 708                           | Éric Mercier         |
|                                 | Hôtel-Dieu de Québec, CHU de Québec/ 709                                      | Éric Mercier         |
|                                 | IUCPQ: Institut universitaire de cardiologie et de pneumologie de Québec/ 710 | Sébastien Robert     |
|                                 | Hôpital du Sacré-Coeur de Montreal/ 711                                       | Raoul Daoust         |
| <b>Ontario</b>                  |                                                                               |                      |
| Laurie Morrison & Steven Brooks | Sunnybrook/ 401                                                               | Ivy Cheng            |
|                                 | The Ottawa Hospital - Civic Campus/ 403                                       | Jeffrey Perry        |
|                                 | The Ottawa Hospital - General Campus/ 404                                     | Jeffrey Perry        |

|                         |                                                  |                                 |
|-------------------------|--------------------------------------------------|---------------------------------|
|                         | Kingston/Queens/ 406                             | Steven Brooks                   |
|                         | Hamilton General Hospital/ 407                   | Michelle Welsford               |
|                         | Health Science North, Sudbury Ontario/ 408       | Rob Ohle                        |
|                         | University Hospital – LHSC/ 409                  | Justin Yan                      |
|                         | North York General Hospital, Toronto/ 410        | Rohit Mohindra                  |
|                         | Victoria Hospital – LHSC/ 412                    | Justin Yan                      |
|                         | Toronto Western Hospital/ 414                    | Megan Landes                    |
| <b>Manitoba</b>         |                                                  |                                 |
| Tomislav Jelic          | Health Sciences Centre/ 307                      | Tomislav Jelic                  |
| <b>Saskatchewan</b>     |                                                  |                                 |
| Phil Davis              | St Paul's Hospital, Saskatoon/ 303               | Phil Davis                      |
|                         | Royal University, Saskatoon/ 304                 | Phil Davis                      |
|                         | Saskatoon City Hospital, Saskatoon/ 305          | Phil Davis                      |
| <b>Alberta</b>          |                                                  |                                 |
| Andrew McRae            | University of Alberta Hospital, Edmonton/ 201    | Brian Rowe                      |
|                         | Foothills, Calgary/ 202                          | Katie Lin                       |
|                         | Rockyview, Calgary/ 203                          | Andrew McRae                    |
|                         | Peter Lougheed Centre/ 204                       | Andrew McRae                    |
|                         | South Campus, Calgary/ 205                       | Stephanie VandenBerg            |
|                         | Northeast Community Health Centre, Edmonton/ 206 | Jake Hayward, Jaspreet Khangura |
|                         | Royal Alexandra Hospital, Edmonton/ 306          | Jake Hayward, Jaspreet Khangura |
| <b>British Columbia</b> |                                                  |                                 |
| Corinne Hohl            | Vancouver General Hospital/ 101                  | Daniel Ting                     |
|                         | Lions Gate Hospital/ 102                         | Maja Stachura                   |
|                         | Saint Paul's Hospital/ 103                       | Frank Scheuermeyer              |
|                         | Mount St Joseph's/ 104                           | Frank Scheuermeyer              |
|                         | Surrey Memorial Hospital/ 105                    | Balijeet Braar                  |
|                         | Royal Columbian Hospital/ 106                    | John Taylor                     |
|                         | Abbotsford Regional Hospital/ 107                | Ian Martin                      |
|                         | Eagle Ridge Hospital/ 108                        | Sean Wormsbecker                |
|                         | Royal Inland Hospital/ 112                       | Ian Martin                      |
|                         | Kelowna General / Hospital/ 115                  | Lee Graham                      |

It was not possible for us to recruit Members from Newfoundland and Labrador, Northwest Territories, Nunavut, Prince Edward Island and Yukon at the time of the inception of the registry.
