# Supplementary material for: Faciliter l’accès aux données administratives sur la vaccination anti-SRAS-CoV-2 aux fins de la recherche
Source: PubMed Central journal article supplement — CMAJ. 2022 Aug 29;194(33):E1147–52. [Article in French] doi: 10.1503/cmaj.211712-f (PMC9435537; doi:10.1503/cmaj.211712-f), 2022-08-29
Supplement: 211712-ana-2-at.pdf [file 211712-ana-2-at.pdf]

## APPENDIX

The information presented in **Table 1** derives from a legal analysis of applicable provincial laws and regulations, as well as searches of court decisions for additional guidance about the scope and meaning of the laws and regulations in question, including *Gordon v. Canada (Health)*, 2008 FC 254, and *Canada (Information Commissioner) v. Canada (Public Safety and Emergency Preparedness)*, 2019 FC 1279. Below, a list of the primary statutes pertaining to personal health information and public health in each of the ten Canadian provinces. Regulations enacted under these statutes were also analysed but are not listed below.

### British Columbia

*E-Health (Personal Health Information Access and Protection of Privacy) Act*, SBC 2008, c. 38.  
*Public Health Act*, SBC 2008, c. 28.

### Alberta

*Health Information Act*, RSA 2000, c. H-5.  
*Public Health Act*, RSA 2000, c. P-37.

### Saskatchewan

*Health Information Protection Act*, SS 1999, c. H-0.021.  
*Public Health Act*, RSS 1978, c. P-37.  
*Public Health Act*, SS 1994, c. P-37.1.

### Manitoba

*Personal Health Information Act*, CCSM c. P33.5.  
*Public Health Act*, CCSM c. P210.

### Ontario

*Personal Health Information Protection Act*, SO 2004, c. 3, Sch A.  
*Health Protection and Promotion Act*, RSO 1990, c H.7

### Québec

*An Act respecting Access to documents held by public bodies and the Protection of personal information*, CQLR c. A-2.1.  
*An Act respecting the sharing of certain health information*, CQLR c. P-9.0001.  
*Public Health Act*, CQLR c. S-2.2.

### New Brunswick

*Personal Health Information Privacy and Access Act*, SNB 2009, c. P-7.05.  
*Public Health Act*, SNB 1998, c. P-22.4.

### Nova Scotia

*Personal Health Information Act*, SNS 2010, c. 41.  
*Health Protection Act*, SNS 2004, c. 4.

**Prince Edward Island**

*Health Information Act*, RSPEI 1988, c. H-1.41.

*Public Health Act*, RSPEI 1988, c. P-30.1.

**Newfoundland and Labrador**

*Personal Health Information Act*, SNL 2008, c. P-7.01.

*Public Health Protection and Promotion Act*, SNL 2018, c. P-37.3.
